# Supplementary material for: An in situ high-temperature scanning electron microscopy study of acanthite–argentite phase transformation in nanocrystalline silver sulfide powder
Source: Royal Society of Chemistry journal article supplement (doi:10.1039/c5cp02499d), 2015-01-01
Supplement: c5cp02499d1.pdf [file c5cp02499d1.pdf]

Short title for the movie

Movie S1. 3D SEM Imaging of Phase Transformation from Acanthite to Argentite in  $\text{Ag}_2\text{S}$  nanopowder

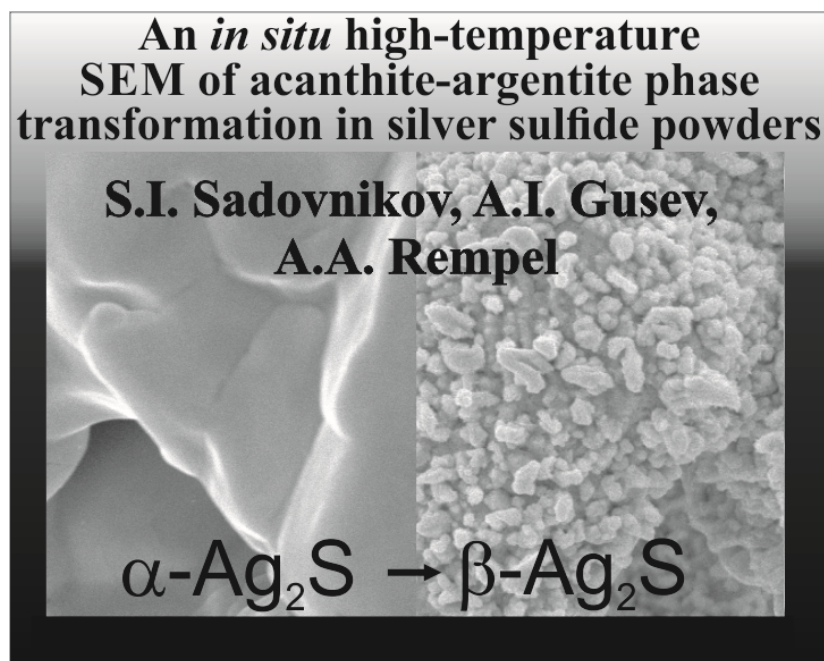

Keywords for movie

Silver sulfide, Nanopowder, Phase Transformation from Acanthite  $\alpha\text{-Ag}_2\text{S}$  to Argentite  $\beta\text{-Ag}_2\text{S}$ , *in situ* SEM

Movie legend

As a result of heating, short pyramidal nuclei of argentite  $\beta\text{-Ag}_2\text{S}$  appear on the surface of  $\alpha\text{-Ag}_2\text{S}$  acanthite particles. The nuclei grow quickly and take the form of whiskers from 500 nm to 1  $\mu\text{m}$  and more in length. The formation of argentite ends when no low-temperature acanthite remains in the surface layer of silver sulfide.
